# Supplementary material for: Patients’ perspectives on the barriers to referral after telescreening for diabetic retinopathy in communities
Source: PubMed Central journal article supplement — BMJ Open Diabetes Res Care. 2020 Mar 18;8(1):e000970. doi: 10.1136/bmjdrc-2019-000970 (PMC7103829; doi:10.1136/bmjdrc-2019-000970), 2020-03-18
Supplement: bmjdrc-2019-000970supp002.pdf [file bmjdrc-2019-000970supp002.pdf]

**Supplemental Table S1.** Text of each barrier item to referral after telescreening for diabetic retinopathy in the cross-sectional survey

| Barriers to referral                                              | Text of survey items                                                                                                                |
|-------------------------------------------------------------------|-------------------------------------------------------------------------------------------------------------------------------------|
| <b><i>Knowledge- and Attitude-related Factors</i></b>             |                                                                                                                                     |
| Distrust the recommended hospital                                 | I trust the recommended superior hospital.                                                                                          |
| Fear of examination and treatment                                 | I am afraid of ophthalmologic examination and treatment (e.g. fundus fluorescein angiography, retinal photocoagulation or surgery). |
| Difficulty in getting time to referral                            | My life is too busy for going to the hospital.                                                                                      |
| Too much trouble to see an ophthalmologist in a superior hospital | It is too much trouble to see an ophthalmologist in a superior hospital.                                                            |
| My eyes are okay                                                  | My eyes are very ill.                                                                                                               |
| No serious illness need treatment at present                      | I don't think there is any serious illness for treatment at present.                                                                |
| Too old to need any more treatment                                | I'm old, and I don't want any more treatment.                                                                                       |
| Good eyesight in the other eye                                    | If one eye can see, I don't think it's necessary to see a doctor immediately.                                                       |
| No effective treatment for diabetic retinopathy at present        | I think there is no effective treatment for diabetic retinopathy at present.                                                        |
| <u>Depression</u>                                                 | Over the past 4 weeks I have felt blue, downhearted, or depressed.                                                                  |
| Have been diagnosed or treated before telescreening               | Before participated the screening, I had seen an eye doctor.                                                                        |
| No response to previous treatment                                 | I have been treated for diabetic retinopathy, but it didn't work.                                                                   |
| <b><i>Logistics-related Factors</i></b>                           |                                                                                                                                     |
| Financial difficulties                                            | I can't afford the cost of ophthalmic examination or treatment.                                                                     |
| Mobility or <u>transportation</u> difficulties                    | It is hard for me to travel to an eye doctor.                                                                                       |
| Lack of an escort                                                 | No one can accompany me to see an eye doctor.                                                                                       |

**Question:**

We are interested in why some people do not referral to the superior hospitals.

Can you think of the main reason for the incomplete referral?

**Supplemental Table S2.** Associations between incomplete referral and the number of significant barriers experienced by the participants

| Number of significant barriers to referral | Experiencing |                         | Not experiencing |                         | OR (95% CI)      | P Value |
|--------------------------------------------|--------------|-------------------------|------------------|-------------------------|------------------|---------|
|                                            | Total (%)    | Incomplete referral (%) | Total (%)        | Incomplete referral (%) |                  |         |
| ≥ 1                                        | 2973 (89.3)  | 1140 (48.4)             | 358 (10.7)       | 99 (27.7)               | 2.46 (1.93-3.13) | <0.001  |
| ≥ 2                                        | 2021 (60.7)  | 1124 (55.6)             | 1310 (39.3)      | 415 (31.7)              | 2.70 (2.34-3.13) | <0.001  |
| ≥ 3                                        | 1036 (31.1)  | 680 (65.6)              | 2295 (68.9)      | 859 (37.4)              | 3.20 (2.74-3.72) | <0.001  |
| ≥ 4                                        | 389 (11.7)   | 265 (68.1)              | 2943 (88.3)      | 1274 (43.3)             | 2.80 (2.23-3.51) | <0.001  |
| ≥ 5                                        | 116 (3.5)    | 85 (73.3)               | 3215 (96.5)      | 1454 (45.2)             | 3.32 (2.19-5.04) | <0.001  |

---

|          |          |           |             |             |                   |       |
|----------|----------|-----------|-------------|-------------|-------------------|-------|
| $\geq 6$ | 17 (0.5) | 13 (76.5) | 3314 (99.5) | 1526 (46.0) | 3.81 (1.24-11.70) | 0.012 |
|----------|----------|-----------|-------------|-------------|-------------------|-------|

---

### Figure legends

**Supplemental Figure S1.** The study process of the Shanghai Diabetic Eye Study

DR, diabetic retinopathy; NPDR, mild non-proliferative diabetic retinopathy; DME, diabetic macular edema

**Supplemental Figure S2.** Categorization of substantive responses to the main barrier to the referral in participants with incomplete referrals (N=1,368)
