# Supplementary figures and images for: Patients’ perspectives on the barriers to referral after telescreening for diabetic retinopathy in communities
Source: PubMed Central journal article supplement — BMJ Open Diabetes Res Care. 2020 Mar 18;8(1):e000970. doi: 10.1136/bmjdrc-2019-000970 (PMC7103829; doi:10.1136/bmjdrc-2019-000970), 2020-03-18

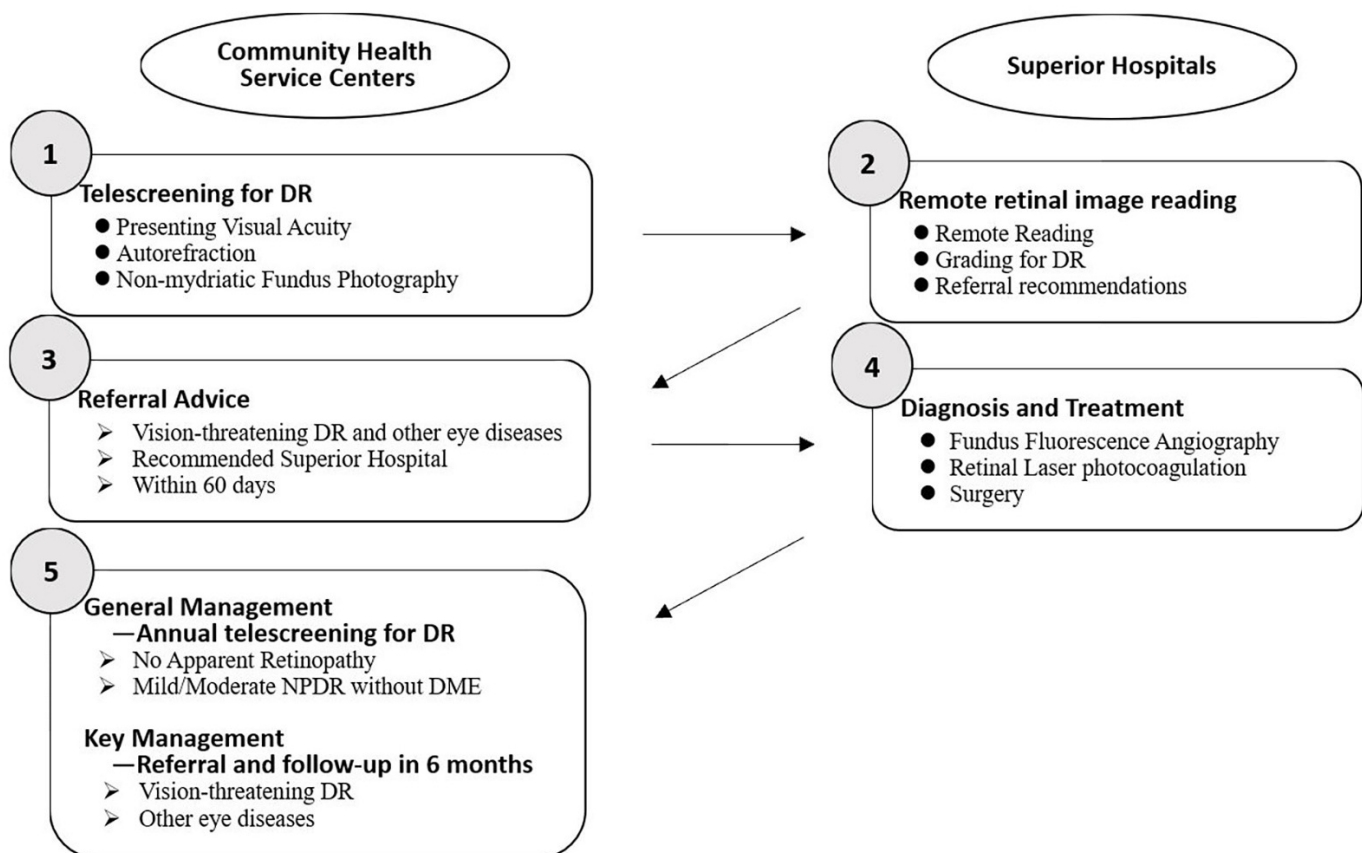

Supplement: bmjdrc-2019-000970supp001.pdf [file bmjdrc-2019-000970supp001.pdf]

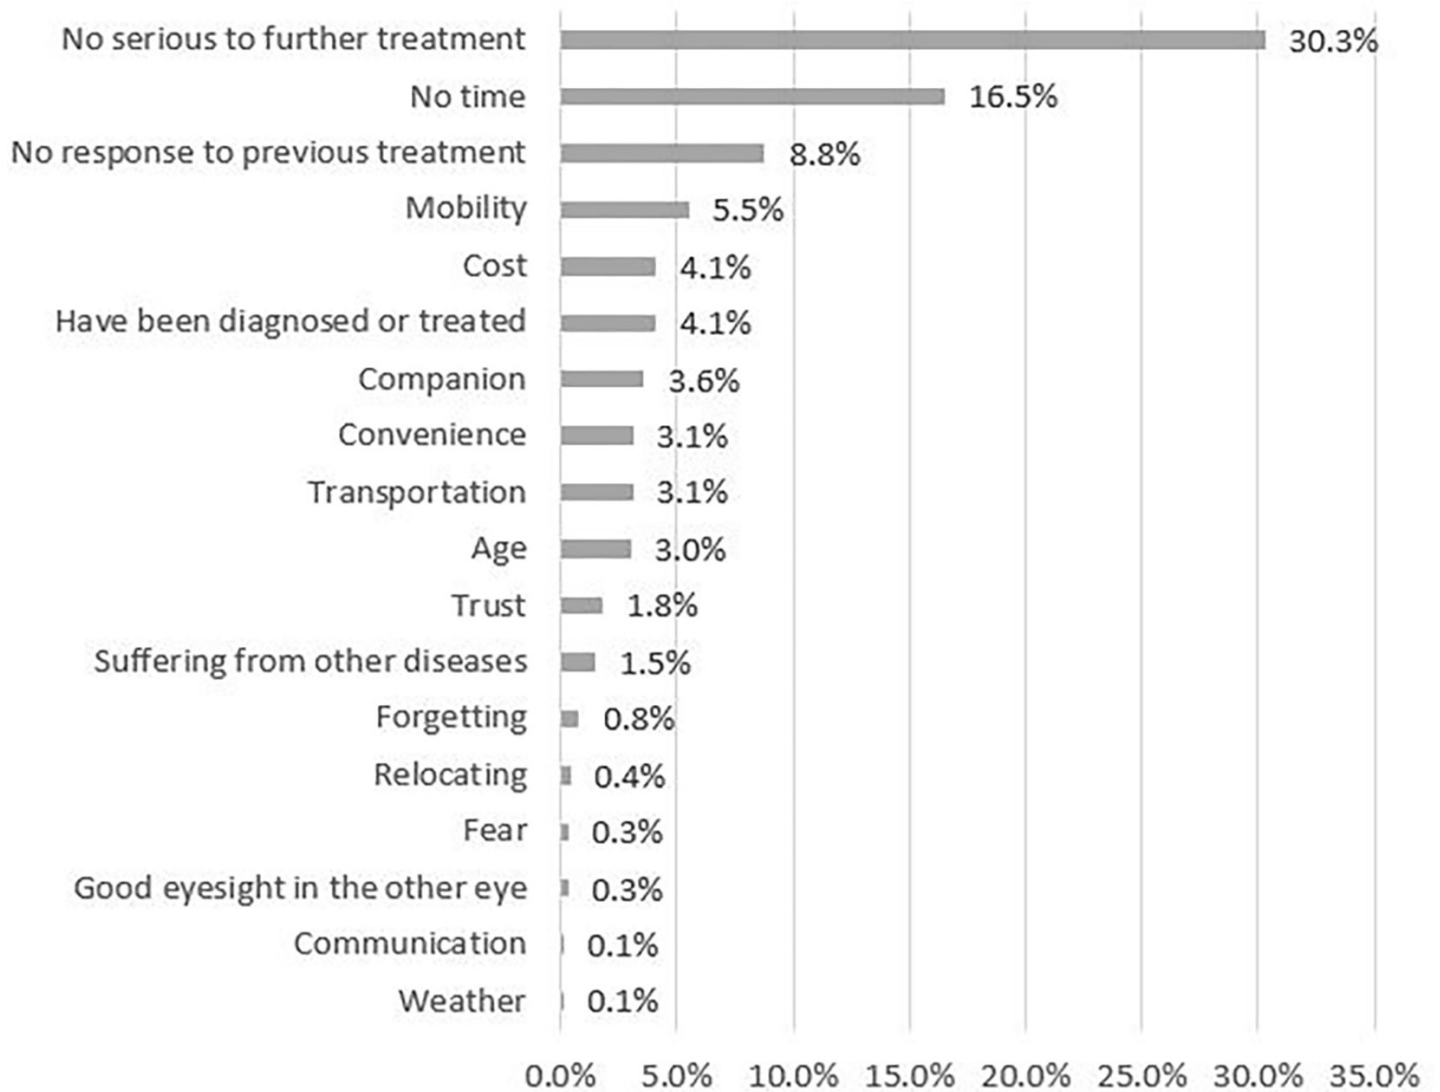

Supplement: bmjdrc-2019-000970supp003.pdf [file bmjdrc-2019-000970supp003.pdf]
